# Supplementary material for: Development of a quantitative loop-mediated isothermal amplification assay for the field detection of Erysiphe necator
Source: PeerJ. 2018 Apr 20;6:e4639. doi: 10.7717/peerj.4639 (PMC5912203; doi:10.7717/peerj.4639)
Supplement: Supplemental Information 1 — Data are provided for number of detection events for each assay, CT values that represent assay sensitivity and standard curve, as well as daily spore concentrations observed in the research vineyard. [file peerj-06-4639-s001.xlsx]

## Sheet: Standard Curve
Standard Curve Dilution Series CT Values (3 reaction replicates per dilution series)
A	CT	Std Dev	B	CT	Std Dev	C	CT	Std Dev	D	CT	Std Dev	E	CT	Std Dev	F	CT	Std Dev
1 Spore	20.5	1 of 3 amp	1 Spore	14.2354	1.68863	1 Spore	12.3621	1 of 3 amp	1 Spore	11.6094	0.245466	1 Spore	12.0546	0.524647	1 Spore
10 Spore	13.3736	1.14479	10 Spore	11.2646	0.0752953	10 Spore	11.3805	0.116374	10 Spore			10 Spore	10.6852	0.401504	10 Spore	10.9651	0.621118
100 Spore	9.11399	0.456485	100 Spore	9.09958	0.255344	100 Spore	9.08834	0.209647	100 Spore	9.23435	0.0377843	100 Spore	8.65692	0.164133	100 Spore	8.38454	0.141708
1 K Spore	7.79535	0.314828	1 K Spore	7.85457	0.115967	1 K Spore	8.61749	0.240986	1 K Spore	7.72012	0.0466734	1 K Spore	7.23615	0.313729	1 K Spore	7.59578	0.361886
10 K Spore	6.81223	0.0417921	10 K Spore	7.24417	0.209815	10 K Spore	7.73581	0.0937474	10 K Spore	7.25633	0.239424	10 K Spore	6.58964	0.342701	10 K Spore	6.69703	0.173496
Log Spore	CT
0.3	14.1523	3.68686
1	11.5338	1.17193
2	8.92962	0.221287
3	7.80324	0.496386
4	7.05587	0.444109

## Sheet: Sensitivity
CT Values of Spore Dilution Series
	A	B	C	D	E	F	G	H	I	J	Positive Amplifications
Non-Template Controls											0
1 Spore	20.5	14.24	12.36	12.05		12.36	11.61	12.05		12.69	0.8
10 Spore	13.37	11.26	11.38	10.69	10.97	11.38	10.64	10.69	10.97	10.69	1
100 Spore	9.11	9.1	9.09	8.66	8.38	9.09	9.23	8.66	8.38	8.25	1
1 K Spore	7.8	7.85	8.62	7.24	7.6	8.62	7.72	7.24	7.6	7.03	1
10 K Spore	6.81	7.24	7.74	6.59	6.7	7.74	7.26	6.59	6.7	7	1
Sensitivity
log Spore Concentration	Percent Amplification
0	0
0.3	0.8
1	1
2	1
3	1
4	1

## Sheet: 13 qLAMP qPCR Summary
2013 qLAMP v qPCR (Daily Collection)				2013 qLAMP v qPCR (Biweekly Collection)
Collection Date	qLAMP Spore Quantity	qPCR Spore Quantity		Collection Date	qLAMP Spore Quantity	qPCR Spore Quantity
2013-04-17	0	0		2013-04-18	0	0
2013-04-18	0	0		2013-04-22	0	0
2013-04-19	0	0		2013-04-25	0	0
2013-04-20	0	0		2013-04-29	0	0
2013-04-21	0	0		2013-05-02	0	0
2013-04-22	0	0		2013-05-06	0	0
2013-04-23	0	0		2013-05-09	12.1233	2.31492
2013-04-24	0	0		2013-05-13	0	0.608349
2013-04-25	0	0		2013-05-16	0.686072	2.80187
2013-04-26	0	0		2013-05-20	0	35.7223
2013-04-27	0	0		2013-05-23	182.868	6.8292
2013-04-28	0	0		2013-05-27	0	15.619
2013-04-29	0	0		2013-05-30	5.23226	23.2185
2013-04-30	0	0.0793889		2013-06-03	0	2.82799
2013-05-01	0.127268	2.98597		2013-06-06	0	6.47657
2013-05-02	0	0		2013-06-10	5.67917	7.24464
2013-05-03	0	0		2013-06-13	0	38.275
2013-05-04				2013-06-17	13.4531	23.3503
2013-05-05	0	0		2013-06-20	6.55755	5.98334
2013-05-06	0			2013-06-24	11.4083	23.6459
2013-05-07	0	9.38763		2013-06-27	28.8778	9.98202
2013-05-08	0	1.07867		2013-07-01	5.04222	8.32143
2013-05-09	0	1.14954		2013-07-04	9.89224	22.423
2013-05-10	0	3.18216		2013-07-08	5.50976	55.7622
2013-05-11	0	2.80187		2013-07-11	19.21	76.1202
2013-05-12	0	0		2013-07-15	14.573	34.4996
2013-05-13	0	0		2013-07-18	15.4234	118.161
2013-05-14	0	3.18216		2013-07-22	0	69.8252
2013-05-15		4.96802		2013-07-22	14.9351	9.31894
2013-05-16	25.3113	4.10461		2013-07-25	20.1232	27.6865
2013-05-17	2.95775	13.7524		2013-07-29	19.6748	54.1943
2013-05-18	0	12.1089		2013-08-01	13.6995	57.7735
2013-05-19	0	7.75612		2013-08-05	53.134	63.0466
2013-05-20	23.8958	8.26574		2013-08-08	22.557	45.1274
2013-05-21	5.7856	4.96802		2013-08-12	48.8154
2013-05-22	75.3928	0			0.13894
2013-05-23	22.4527	0
2013-05-24	0	0
2013-05-25	0	6.8292
2013-05-26	0	1.30557
2013-05-27	0	6.40815
2013-05-28	0	8.12493
2013-05-29	8.48766	19.4661
2013-05-30	0	5.81363
2013-05-31	0	0.763909
2013-06-01	0.606093	1.48466
2013-06-02	0
2013-06-03	8.97741	5.11495
2013-06-04	0	5.56257
2013-06-05	0	2.46086
2013-06-06	0	16.9999
2013-06-07	4.87898	4.5756
2013-06-08	0	14.669
2013-06-09	6.85447	22.1422
2013-06-10	3.10957	28.1493
2013-06-11	6.18879	17.1266
2013-06-12	2.58636	23.3264
2013-06-13	14.7215	37.0928
2013-06-14	10.6011	11.083
2013-06-15	28.6449	14.918
2013-06-16	8.35647	4.30022
2013-06-17	24.2355	23.3058
2013-06-18	13.573	35.5807
2013-06-19	0	2.35412
2013-06-20	0	20.0034
2013-06-21	1.11879	4.58966
2013-06-22	10.3722	7.07437
2013-06-23	10.2144	28.4934
2013-06-24	6.82617	11.3705
2013-06-25	59.7908	27.0139
2013-06-26	0	1.62234
2013-06-27	20.5077	18.6797
2013-06-28	6.21494	58.8255
2013-06-29	7.02683	17.4192
2013-06-30	20.2865	42.4772
2013-07-01	23.5183
2013-07-02	2.3563	13.2918
2013-07-03	4.15768
2013-07-04	3.52371	66.9763
2013-07-05	13.8377	81.0334
2013-07-06	9.09176	26.8922
2013-07-07	22.8278	33.7965
2013-07-08	16.7631	110.709
2013-07-09	18.2969	74.91
2013-07-10	14.7827	45.8479
2013-07-11	0	23.2284
2013-07-12	11.6536	16.5924
2013-07-13	5.93536	88.8988
2013-07-14	41.5866	198.835
2013-07-15	23.2326	229.807
2013-07-16	20.2309	110.642
2013-07-17	15.3402	57.3176
2013-07-18	40.5231	117.231
2013-07-19	16.1364	29.4199
2013-07-20	38.3669	68.6388
2013-07-21	31.4923	123.021
2013-07-22	14.9935	6.00129
2013-07-23	19.3076	31.9528
2013-07-24	19.7369	16.1461
2013-07-25	42.0295	30.2227
2013-07-26	24.8221	136.566
2013-07-27	20.1118	65.7261
2013-07-28	27.673	79.6242
2013-07-29	25.266	94.0351
2013-07-30	41.5659	51.3829
2013-07-31	14.481	27.1645
2013-08-01	26.6787	37.163
2013-08-02	29.3106	6.61349
2013-08-03	59.5557	72.3278
6013-08-04	37.8915
2013-08-05	100.099	63.2411
2013-08-06	68.6272
6013-08-07	29.8052	33.5936
2013-08-08	26.2246	50.006
2013-08-09	51.5767	96.89
2013-08-10	.
2013-08-11	200.565	109.436
2013-08-12	78.1344
	8.13203e-05

## Sheet: 14 qLAMP qPCR Summary
2014 qLAMP v qPCR (Daily Collection)				2014 qLAMP v qPCR (Biweekly Collection)
Collection Date	qLAMP Spore Quantity	qPCR Spore Quantity		Collection Date	qLAMP Spore Quantity	qPCR Spore Quantity
2014-04-18	0	2.03827		2014-04-17	0	0
2014-04-19	0	1.21613		2014-04-21	0	0
2014-04-20	0	7.24302		2014-04-24	0	0
2014-04-21	0	0		2014-04-28	0	0
2014-04-22	0	0		2014-05-01	0	0
2014-04-23	0	0		2014-05-05	0
2014-04-24	1.83993	0		2014-05-08	0	0
2014-04-25	0	0		2014-05-12	0	1.8993
2014-04-26	0	0		2014-05-15	0	3.77677
2014-04-27	0	0		2014-05-19	0	4.53205
2014-04-28	0	0		2014-05-22	0	10.596
2014-04-29	0	0		2014-05-26	0	1.62515
2014-04-30	0	0		2014-05-29	1.13619	1.74037
2014-05-01	0	0		2014-06-02	0.1	14.821
2014-05-02	0	0		2014-06-06	0.1	29.2377
2014-05-03	0	0		2014-06-09	0	22.9966
2014-05-04	0.1	0		2014-06-12	0.1	29.5112
2014-05-05	1.48144	0		2014-06-17	7.59506	36.2127
2014-05-06	0	0		2014-06-19	1.48896	36.6497
2014-05-07	0	0		2014-06-23	0	61.3389
2014-05-08	0	3.75994		2014-06-26	22.8667	8.87834
2014-05-09	0	0		2014-06-30	3.38055	155.301
2014-05-10	0	0		2014-07-03	.	92.9318
2014-05-11	0	8.55851		2014-07-07	1.34389	169.103
2014-05-12	0	0		2014-07-10	4.2959	196.472
2014-05-13	0	10.2182		2014-07-14	1.12392	97.0958
2014-05-14	0	1.82796		2014-07-17	1.42086	28.4891
2014-05-15	0	14.2244		2014-07-21	1.21088	132.703
2014-05-16	0	3.08006		2014-07-24	1.28033	62.3412
2014-05-17	0	2.33794		2014-07-29	5.7778	30.0103
2014-05-18	2.0339	110.491		2014-07-31	121.562	193.386
2014-05-19	0	23.368		2014-08-04	3.27598	5.06466
2014-05-20	.	70.5188		2014-08-07	3.02899	72.3727
2014-05-21	0	0		2014-08-11	2.40498	224.664
2014-05-22	1.77657	13.754		2014-08-14	393.288	117.553
2014-05-23	0.1	0		2014-08-18	106.365	203.825
2014-05-24	0	0		2014-08-22	1.16229	612.099
2014-05-26	1.09686	.		2014-08-26	6.45745	1519.66
2014-05-27	1.19451	10.374		2014-08-28	171.978	171.293
2014-05-28	0	3.52229		2014-09-08	18.0366	537.828
2014-05-29	0	6.63861		2014-09-12	4.83742	322.539
2014-05-30	0	2.88294		2014-09-15	50.6709	165.72
2014-05-31	1.39164	16.7932		2014-09-18	2.9687	1332.22
2014-06-01	3.68395	20.7971			0.0100595
2014-06-02	0	3.19606
2014-06-03	0	12.2167
2014-06-04	1.24535	1.59808
2014-06-05	.	16.5014
2014-06-06	0	.
2014-06-07	1.85364	78.6487
2014-06-08	3.90341	17.3768
2014-06-09	5.1378	10.6726
2014-06-10	0	22.1762
2014-06-11	1.0975	70.0569
2014-06-12	4.2244	19.2138
2014-06-13	1.83289	38.853
2014-06-14	4.30714	80.7071
2014-06-15	0	75.1742
2014-06-17	0	22.5028
2014-06-18	1.43196	19.426
2014-06-19	5.82169	9.28705
2014-06-20	0	32.3735
2014-06-21	0	4.01145
2014-06-22	0	32.4576
2014-06-23	0	46.5139
2014-06-24	1.20526	8.2197
2014-06-25	0	15.2313
2014-06-26	15.8375	7.35411
2014-06-27	0	3.36433
2014-06-28	6.68471	.
2014-06-29	0	.
2014-06-30	15.3204	16.6926
2014-07-01	74.7548	104.874
2014-07-02	1.636	115.937
2014-07-03	85.0575	.
2014-07-04	1.25199	130.442
2014-07-05	49.0886	113.849
2014-07-06	114.194	278.115
2014-07-07	55.2491	220.955
2014-07-08	43.9631	269.39
2014-07-09	1.38681	238.009
2014-07-10	266.693	161.676
2014-07-11	5.40981	77.037
2014-07-12	1.53659	205.037
2014-07-13	1.28001	100.427
2014-07-14	12.6989	20.15
2014-07-15	9.35851	215.884
2014-07-16	3.20448	127.618
2014-07-17	2.50367	45.4946
2014-07-18	7.16828	26.2793
2014-07-19		192.601
2014-07-20
2014-07-21	1.14148
2014-07-22	5.4208	246.559
2014-07-23	13.425	112.293
2014-07-24	59.7583	20.0466
2014-07-25	15.6674	42.1475
2014-07-26	1.12484	219.435
2014-07-27	1.57375	242.454
2014-07-28	.	156.666
2014-07-29	1.10293	.
2014-07-30	7.85386	60.8283
2014-07-31	.	216.307
2014-08-01	1.09595	.
2014-08-02	1.81352	53.3793
2014-08-03	.	.
2014-08-04	1.1159	.
	4.22438e-07

## Sheet: Grower qLAMP
Total Grower Positive Detections					AA							AD							AG												TH			ST
	Field	Grower	Lab			Negative	Positive	Field	Lab	Blind Samples: 1			Negative	Positive	Field	Lab	Blind samples: 6			Negative	Positive	Field	Lab	Blind Samples: 2			Negative	Positive	Field	Lab				Negative	Positive	Field	Lab
2014-04-17	AA	0	0		2014-04-17			0	0	A		2014-04-17	.	.	.		A		2014-04-17	.	.	.		A		2014-04-17	0	1	0				2014-04-17	.	.	.
2014-04-21	AA	0	0		2014-04-21	0	1	0		B		2014-04-21	0	1	0		B	0	2014-04-21	.	.	.		B		2014-04-21	0	1	0				2014-04-21	0	1	0
2014-04-24	AA	0	0		2014-04-24	0	1	0		C		2014-04-24	0	1	1		C		2014-04-24	.	.	.		C		2014-04-24	0	1	1				2014-04-24	0	1	0
2014-05-01	AA	0	0		2014-05-01	0	1	0		D		2014-05-01	0	1	1		D	1	2014-05-01	0	1	0		D		2014-05-01	0	1	1		0		2014-05-01	0	1	0
2014-05-05	AA	0	0		2014-05-05	0	1	0		E	1	2014-05-05	0	1	0		E		2014-05-05	0	1	0		E	1	2014-05-05	.	.	.				2014-05-05	0	1	0
2014-05-08	AA	0	1		2014-05-08	0	1	0		F	0	2014-05-08	.	.	.		F	1	2014-05-08	0	1	0		F	1	2014-05-08	0	1	1		0		2014-05-08	0	1	0
2014-05-12	AA	.	0		2014-05-12	.	.	.		G		2014-05-12	0	1	0		G		2014-05-12	.	.	.				2014-05-12	0	1	0		0		2014-05-12	0	1	0
2014-05-15	AA	0	0		2014-05-15	0	1	0				2014-05-15	0	1	0				2014-05-15	0	1	0				2014-05-15	0	1	0		0		2014-05-15	0	1	0
2014-05-19	AA	0	0		2014-05-19	0	1	0				2014-05-19	0	1	0				2014-05-19	0	1	0				2014-05-19	0	1	0		0		2014-05-19	0	1	0
2014-05-22	AA	0	0		2014-05-22	0	1	0				2014-05-22	0	1	0				2014-05-22	0	1	0				2014-05-22	0	1	0		0		2014-05-22	0	1	0
2014-05-27	AA	0	0		2014-05-27	0	1	0				2014-05-27	0	1	0				2014-05-27	0	1	0				2014-05-27	0	1	0		0		2014-05-27	.	.	.
2014-05-29	AA	0	1		2014-05-29	0	1	0				2014-05-29	0	1	0				2014-05-29	0	1	0				2014-05-29	0	1	0		0		2014-05-29	0	1	0
2014-06-02	AA	0	0		2014-06-02	0	1	0				2014-06-02	0	1	0				2014-06-02	0	1	0				2014-06-02	0	1	0		1		2014-06-02	.	.	.
2014-06-05	AA	0	0		2014-06-05	0	1	0				2014-06-05	0	1	1				2014-06-05	.	.	.				2014-06-05	.	.	.		.		2014-06-05	.	.	.
2014-06-09	AA	1	0		2014-06-09	0	1	1				2014-06-09	.	.	.				2014-06-09	.	.	.				2014-06-09	0	1	0		0		2014-06-09	.	.	.
2014-06-12	AA	0	0		2014-06-12	0	1	0				2014-06-12	0	1	0				2014-06-12	0	1	0				2014-06-12	0	1	0		0		2014-06-12	.	.	.
2014-06-16	AA	0	0		2014-06-16	0	1	0				2014-06-16	0	1	0				2014-06-16	0	1	0				2014-06-16	0	1	0		0		2014-06-16	.	.	.
2014-06-19	AA	0	0		2014-06-19	0	1	0				2014-06-19	.	.	.				2014-06-19	0	1	0				2014-06-19	0	1	0		0		2014-06-19	.	.	.
2014-06-23	AA	0	0		2014-06-23	0	1	0				2014-06-23	0	1	1				2014-06-23	0	1	0				2014-06-23	0	1	0		0		2014-06-23	.	.	.
2014-06-26	AA	0	0		2014-06-26	0	1	0				2014-06-26	0	1	1				2014-06-26	0	1	0				2014-06-26	.	.	.		.		2014-06-26	.	.	.
2014-04-17	AD	.	0
2014-04-21	AD	0	0
2014-04-24	AD	1	0
2014-05-01	AD	1	0
2014-05-05	AD	0	0
2014-05-08	AD	.	0
2014-05-12	AD	0	0
2014-05-15	AD	0	0
2014-05-19	AD	0	0
2014-05-22	AD	0	0
2014-05-27	AD	0	0
2014-05-29	AD	0	0
2014-06-02	AD	0	0
2014-06-05	AD	1	0
2014-06-09	AD	.	1
2014-06-12	AD	0	0
2014-06-16	AD	0	0
2014-06-19	AD	.	1
2014-06-23	AD	1	1
2014-06-26	AD	1	0
2014-04-17	AG	.	0
2014-04-21	AG	.	1
2014-04-24	AG	.	0
2014-05-01	AG	0	0
2014-05-05	AG	0	1
2014-05-08	AG	0	0
2014-05-12	AG	.	0
2014-05-15	AG	0	0
2014-05-19	AG	0	0
2014-05-22	AG	0	0
2014-05-27	AG	0	0
2014-05-29	AG	0	0
2014-06-02	AG	0	0
2014-06-05	AG	.	0
2014-06-09	AG	.	1
2014-06-12	AG	0	0
2014-06-16	AG	0	0
2014-06-19	AG	0	0
2014-06-23	AG	0	1
2014-06-26	AG	0	1
2014-04-17	BH	0	0
2014-04-21	BH	0	0
2014-04-24	BH	1	0
2014-05-01	BH	1	0
2014-05-05	BH	.	0
2014-05-08	BH	1	0
2014-05-12	BH	0	0
2014-05-15	BH	0	0
2014-05-19	BH	0	0
2014-05-22	BH	0	0
2014-05-27	BH	0	0
2014-05-29	BH	0	0
2014-06-02	BH	0	0
2014-06-05	BH	.	0
2014-06-09	BH	0	0
2014-06-12	BH	0	0
2014-06-16	BH	0	0
2014-06-19	BH	0	0
2014-06-23	BH	0	0
2014-06-26	BH	.	0
2014-04-17	TH	.	.
2014-04-21	TH	.	.
2014-04-24	TH	.	0
2014-05-01	TH	0	0
2014-05-05	TH	.	0
2014-05-08	TH	0	0
2014-05-12	TH	0	0
2014-05-15	TH	0	0
2014-05-19	TH	0	0
2014-05-22	TH	0	0
2014-05-27	TH	0	0
2014-05-29	TH	0	.
2014-06-02	TH	1	0
2014-06-05	TH	.	0
2014-06-09	TH	0	.
2014-06-12	TH	0	0
2014-06-16	TH	0	0
2014-06-19	TH	0	0
2014-06-23	TH	0	0
2014-06-26	TH	.	0
2014-04-17	ST	.	0
2014-04-21	ST	0	.
2014-04-24	ST	0	.
2014-05-01	ST	0	1
2014-05-05	ST	0	0
2014-05-08	ST	0	0
2014-05-12	ST	0	0
2014-05-15	ST	0	0
2014-05-19	ST	0	0
2014-05-22	ST	0	0
2014-05-27	ST	.	0
2014-05-29	ST	0	0
2014-06-02	ST	.	0
2014-06-05	ST	.	0
2014-06-09	ST	.	0
2014-06-12	ST	.	0
2014-06-16	ST	.	0
2014-06-19	ST	.	0
2014-06-23	ST	.	1
2014-06-26	ST	.	0

## Sheet: Contingency Table
			qPCRc									Fisher’s Exact Test (Probability)d
			Positive	Negative	Total	tp	fp	misclassification rate	accuracy	specificity	sensitivity
L-qLAMPa	2013	Positive	146	13	159	0.918239	0.267516	0.174051	0.825949	0.898438	0.776596	< 0.0001*
		Negative	42	115	157
	2014	Positive	36	8	44	0.818182	0.331522	0.302632	0.697368	0.938931	0.371134	< 0.0001*
		Negative	61	123	184
G-qLAMPb	2014	Positive	2	4	6	0.333333	0.134328	0.178082	0.821918	0.935484	0.181818	0.22*
		Negative	9	58	67
		Total Lab	188	128	316
		Total lab 14	97	131	228
		Total G 14	11	62	73
